# Supplementary material for: The Sulfated Laminarin Triggers a Stress Transcriptome before Priming the SA- and ROS-Dependent Defenses during Grapevine's Induced Resistance against Plasmopara viticola
Source: PubMed Central journal article supplement (PMC3916396; doi:10.1371/journal.pone.0088145), 2014-02-06
Supplement: pone.0088145.s001.pdf [file pone.0088145.s001.pdf]

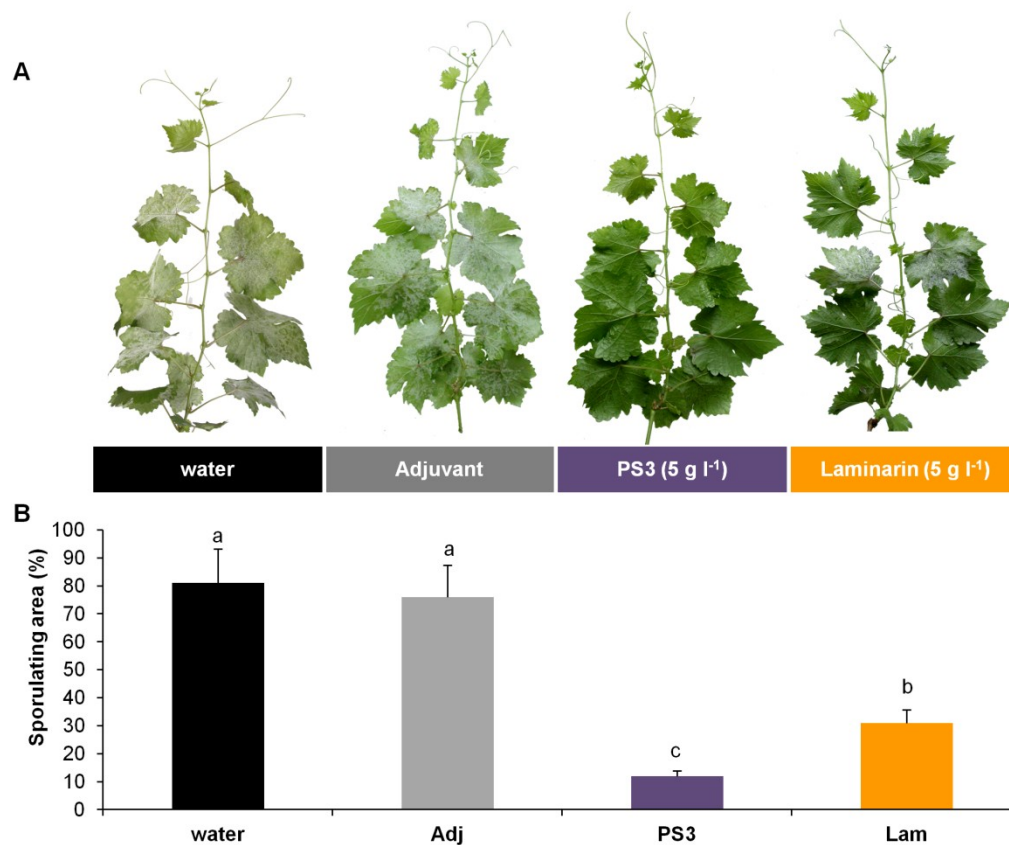

**Figure S1.  $\beta$ -1,3 glucans induce resistance in grapevine against *Plasmopara viticola*.** Plants were sprayed with water, adjuvant (0.05%), PS3 (5 g l<sup>-1</sup>) or Lam (5 g l<sup>-1</sup>) before *P. viticola* inoculation 2 days later (10<sup>4</sup> spores ml<sup>-1</sup>). **A.** Visible disease symptoms at 8 dpi on lower face of the leaves. **B.** Leaf sporulating area evaluated at 8 dpi (%). Data represent means  $\pm$  SD from 6 plants per modality (n=6). Different letters indicate statistically significant differences ( $P < 0.05$ ; ANOVA followed by LSD test). Results are from one representative experiment out of 5 repetitions with similar results.
