# Supplementary material for: The Sulfated Laminarin Triggers a Stress Transcriptome before Priming the SA- and ROS-Dependent Defenses during Grapevine's Induced Resistance against Plasmopara viticola
Source: PubMed Central journal article supplement (PMC3916396; doi:10.1371/journal.pone.0088145), 2014-02-06
Supplement: pone.0088145.s002.pdf [file pone.0088145.s002.pdf]

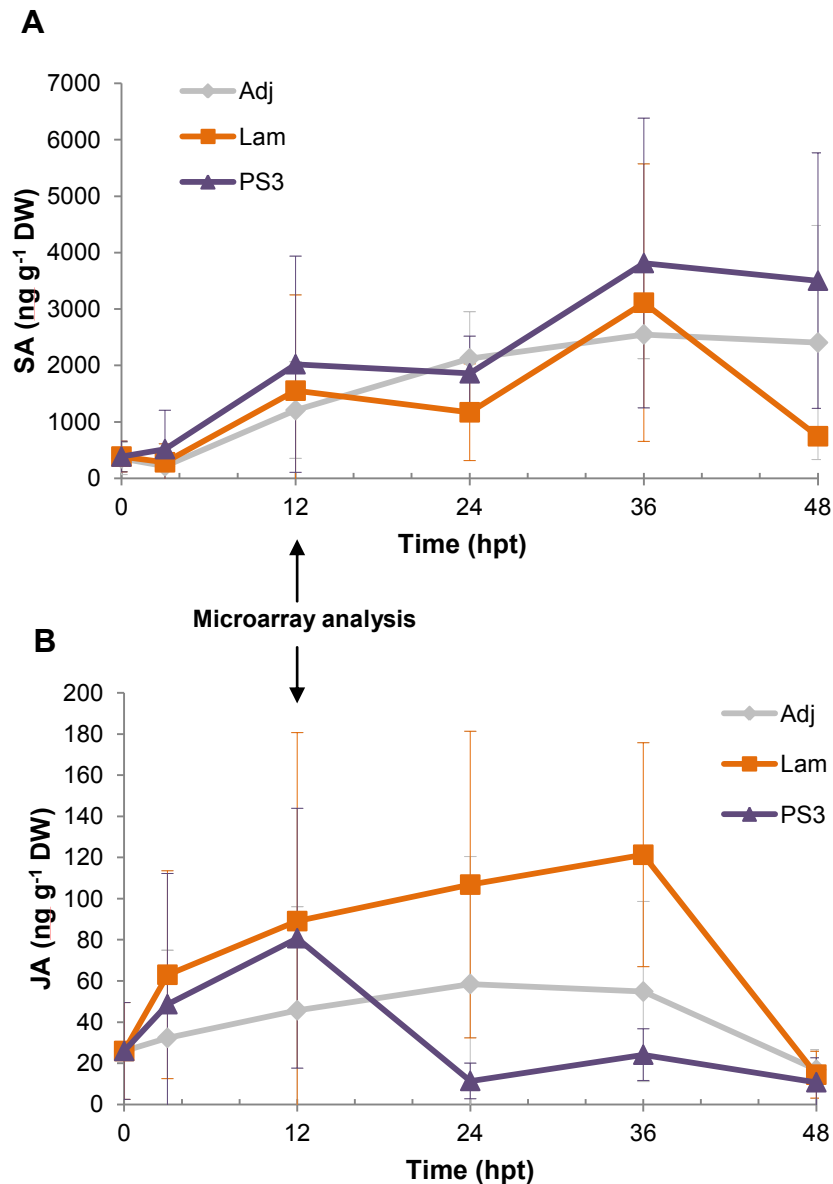

**Figure S2: Quantification of SA and JA in uninfected grapevine plants treated with PS3, Lam, or adjuvant.**

Endogenous SA and JA were quantified by LC-MS in grapevine plants during 48 hours post-treatment (hpt) with PS3, Lam or adjuvant (Adj). No statistical difference ( $P < 0.05$ , student  $t$  test) has been found comparing PS3 vs Adj or Lam vs Adj from three biological independent experiments ( $n=3$ ).
