# Supplementary material for: The Sulfated Laminarin Triggers a Stress Transcriptome before Priming the SA- and ROS-Dependent Defenses during Grapevine's Induced Resistance against Plasmopara viticola
Source: PubMed Central journal article supplement (PMC3916396; doi:10.1371/journal.pone.0088145), 2014-02-06
Supplement: pone.0088145.s003.pdf [file pone.0088145.s003.pdf]

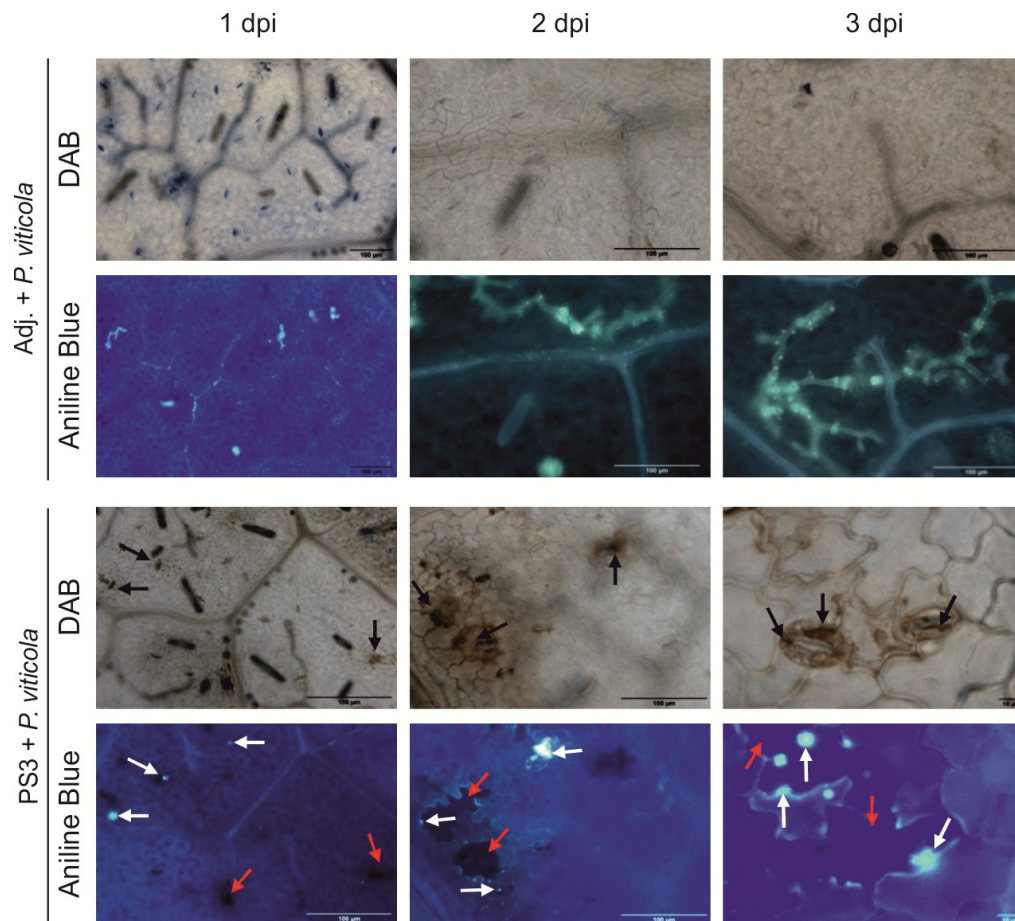

**Figure S3. Primed-H<sub>2</sub>O<sub>2</sub> and callose deposition observed during PS3-IR.** Primed H<sub>2</sub>O<sub>2</sub> production and callose deposition are specifically observed during PS3-IR at 1, 2 and 3 dpi with *P. viticola*, as revealed by 3,3'-diaminobenzidine (DAB) or aniline blue staining, respectively. Pictures are representative of three independent experiments. Black arrows indicate brown precipitates due to H<sub>2</sub>O<sub>2</sub> production and DAB staining. White arrows indicate callose deposition revealed by aniline blue staining. Red arrows indicate dead cells. Bar = 100 or 10 μm.
