# Supplementary material for: The Sulfated Laminarin Triggers a Stress Transcriptome before Priming the SA- and ROS-Dependent Defenses during Grapevine's Induced Resistance against Plasmopara viticola
Source: PubMed Central journal article supplement (PMC3916396; doi:10.1371/journal.pone.0088145), 2014-02-06
Supplement: pone.0088145.s007.pdf [file pone.0088145.s007.pdf]

**Table S4: Sequences of primers used for qPCR experiments.**

| <b>Gene</b>    | <b>Forward primer</b> | <b>Reverse primer</b>      | <b>NCBI identifier</b> |
|----------------|-----------------------|----------------------------|------------------------|
| <i>PR-2</i>    | TCAGCCGTCCTCGGCAAATCA | TTGGCCAGGAGTGGGGAGCC       | XM_002278087           |
| <i>NRX-1</i>   | CTGAGAAGGTGAAGCATGCT  | CTCTCAAACCTCATTGTGCTATT    | XM_002262821           |
| <i>RbohD</i>   | ACCATGCTTCAGTCCCTCCAT | AGCGATCTTCTTGAAGACTTGTCGCC | XM_002268568           |
| <i>HSR203J</i> | TGGAGGAAACATCGTTCACA  | CCTGGACAATTCTGCCATCT       | XM_002285050           |
| <i>VATP16</i>  | CTTCTCCTGTATGGGAGCTG  | CCATAACAACCTGGTACAATCGAC   | XM_002269086           |
